# Supplementary material for: FinaleMe: Predicting DNA methylation by the fragmentation patterns of plasma cell-free DNA
Source: PubMed Central journal article supplement (PMC10981715; doi:10.1038/s41467-024-47196-6), 2024-03-30
Supplement: 41467_2024_47196_MOESM3_ESM.pdf [file 41467_2024_47196_MOESM3_ESM.pdf]

### **Description of Additional Supplementary Files**

File Name: Supplementary Data 1

Description: Meta-data information for each sample.

File Name: Supplementary Data 2

Description: Batch information for cfDNA WGS data.

File Name: Supplementary Data 3

Description: Batch information for cfDNA WGBS data.
